# Supplementary material for: On the role of torsional dynamics in the solid-state fluorescent properties of a new bifluorene–tetracarboxylic acid and its supramolecular assemblies: a structural and TD-DFT investigation
Source: Royal Society of Chemistry journal article supplement (doi:10.1039/d2ce01552h), 2023-01-01
Supplement: d2ce01552h1.pdf [file d2ce01552h1.pdf]

## Electronic Supplementary Information

### On the role of torsional dynamics in the solid-state fluorescent properties of a new bifluorene-tetracarboxylic acid and its supramolecular assemblies: a structural and TD-DFT investigation

Enrico Podda,<sup>a,b</sup> Massimiliano Arca,<sup>a</sup> Anna Pintus,<sup>a</sup> Vito Lippolis,<sup>a</sup> Claudia Caltagirone,<sup>a</sup> Simon J. Coles,<sup>d</sup> James B. Orton,<sup>d</sup> Guido Ennas,<sup>a</sup> Giacomo Picci,<sup>a</sup> Robert P. Davies,<sup>\*c</sup> M. Carla Aragoni<sup>\*a</sup>

<sup>a</sup> Dipartimento di Scienze Chimiche e Geologiche, Università degli Studi di Cagliari, Cittadella Universitaria, SS. 554 bivio Sestu, 09042 Monserrato – Cagliari, Italy.

<sup>b</sup> Centro Servizi di Ateneo per la Ricerca, Università degli Studi di Cagliari, Cittadella Universitaria, SS. 554 bivio Sestu, 09042 Monserrato – Cagliari, Italy.

<sup>c</sup> Department of Chemistry, Imperial College London, White City Campus, 80 Wood Lane, London W12 0BZ, United Kingdom.

<sup>d</sup> UK National Crystallography Service, School of Chemistry, Faculty of Engineering and Physical Sciences, University of Southampton, SO17 1BJ, United Kingdom.

Email: [aragoni@unica.it](mailto:aragoni@unica.it)  
[r.davies@imperial.ac.uk](mailto:r.davies@imperial.ac.uk)

## Table of Contents

|                                                                                                                                                                                                                                                                                                                                                                                                                        |    |
|------------------------------------------------------------------------------------------------------------------------------------------------------------------------------------------------------------------------------------------------------------------------------------------------------------------------------------------------------------------------------------------------------------------------|----|
| <b>Scheme S1</b> Different coordination modes of L <sup>4-</sup> : I) chelating ( $\kappa^2\text{O}$ ); II) chelating/bridging ( $\mu\text{-oxo-}1\kappa^2\text{O}, 2\kappa^1\text{O}$ ), III) bridging ( $\mu\text{-oxo-}1\kappa^1\text{O}, 2\kappa^1\text{O}$ ).....                                                                                                                                                 | 3  |
| <b>FIGURES</b> .....                                                                                                                                                                                                                                                                                                                                                                                                   | 4  |
| <b>Fig. S1</b> Asymmetric unit of <b>1c</b> . Thermal ellipsoids are drawn at 50% probability level. ....                                                                                                                                                                                                                                                                                                              | 4  |
| <b>Fig. S2</b> Crystal structure of <b>1c</b> : intra- and intermolecular $\pi\text{-}\pi$ interactions; hydrogen atoms omitted for clarity. ....                                                                                                                                                                                                                                                                      | 5  |
| <b>Fig. S3</b> Packing diagram of <b>1c</b> along a axis. H atoms are omitted for clarity. Inter-molecular centroid distances 3.73 Å, Br...Br contacts of 3.62 and 3.63 Å. ....                                                                                                                                                                                                                                        | 5  |
| <b>Fig. S4</b> Packing view of the H <sub>4</sub> L chains along the 100 direction. Hydrogen bonding interactions are labelled accordingly to Table S1. Aryl protons not involved in showed interactions have been omitted for clarity reasons. ....                                                                                                                                                                   | 6  |
| <b>Fig. S5</b> Intermolecular hydrogen bonding in the crystal structure of <b>2</b> . Interactions are labelled according to Table S5. Only interacting H atoms are shown for clarity. ....                                                                                                                                                                                                                            | 6  |
| <b>Fig. S6</b> Packing diagrams of <b>2</b> along the a and c axis. Interactions are labelled according to Table S5. Only interacting H atoms are shown for clarity.....                                                                                                                                                                                                                                               | 7  |
| <b>Fig. S7</b> PXRD analysis: experimental patterns on the solvothermal reaction products between H <sub>4</sub> L and Cd(NO <sub>3</sub> ) <sub>2</sub> ·4H <sub>2</sub> O in a 1:2 molar ratio in a DMA/H <sub>2</sub> O mixture (2:1 v/v) at 90 (green) and 120 °C (blue); simulated patterns from CIFs of compounds <b>2</b> (black), <b>3</b> (red), H <sub>4</sub> L(magenta) are also shown for comparison..... | 8  |
| <b>Fig. S8</b> DSC (left) and TGA (right) analysis of compound <b>2</b> (black) and of the mixture <b>2+3</b> (red). ...                                                                                                                                                                                                                                                                                               | 8  |
| <b>Fig. S9</b> Absorption (solid line) and emission (dashed line) spectra for H <sub>4</sub> L measured in DMSO (left; [H <sub>4</sub> L] = 10 <sup>-5</sup> M, $\lambda_{\text{ex}}$ = 303 nm) and in the solid state (right; $\lambda_{\text{ex}}$ = 372 nm).....                                                                                                                                                    | 9  |
| <b>Fig. S10.</b> Normalised solid-state diffuse reflectance spectra (200–600 nm) determined for H <sub>4</sub> L (dark blue), compound <b>2</b> (green), and <b>2+3</b> (red). ....                                                                                                                                                                                                                                    | 10 |

|                                                                                                                                                                                                                                                                                                                                                                                                                                  |    |
|----------------------------------------------------------------------------------------------------------------------------------------------------------------------------------------------------------------------------------------------------------------------------------------------------------------------------------------------------------------------------------------------------------------------------------|----|
| <b>Fig. S11</b> Molecular orbitals isosurfaces calculated for H <sub>4</sub> L in the gas phase at DFT level (PBE0//def2-SVP): HOMO-1 (MO #142; a), HOMO (MO #143; b), LUMO (MO #144; c), and LUMO+1 (MO #145; d). Cutoff value = 0.05  e . Carbon atoms are depicted in grey and oxygen atoms in red; hydrogen atoms omitted for clarity. ....                                                                                  | 11 |
| <b>Fig. S12</b> Molecular orbitals isosurfaces calculated for model complex 4 (a) in the gas phase at DFT level (PBE0//def2-SVP): HOMO-1 (MO #258; b), HOMO (MO #259; c), LUMO (MO #260; d), and LUMO+1 (MO #261; e). Cut-off value = 0.05  e . Carbon atoms are depicted in grey, cadmium ions in green, and oxygen atoms in red; hydrogen atoms omitted for clarity. ....                                                      | 12 |
| <b>Fig. S13</b> Natural transition orbitals (NTOs) isosurfaces calculated for H <sub>4</sub> L in the gas phase at TD-DFT level for transition 4. NTO #143 (particle, a) and NTO #144 (hole, b) exhibit the largest occupations (0.57) for ES #4. Cutoff value = 0.05  e . Carbon atoms are depicted in grey and oxygen atoms in red; hydrogen atoms omitted for clarity. ....                                                   | 12 |
| <b>Fig. S14</b> <sup>1</sup> H NMR (400 MHz, DMSO-d <sub>6</sub> ) of H <sub>4</sub> L. ....                                                                                                                                                                                                                                                                                                                                     | 15 |
| <b>Fig. S15</b> <sup>13</sup> C{ <sup>1</sup> H} NMR (101 MHz, DMSO-d <sub>6</sub> ) of H <sub>4</sub> L. ....                                                                                                                                                                                                                                                                                                                   | 15 |
| <b>Fig. S16</b> <sup>1</sup> H- <sup>13</sup> C HMQC of H <sub>4</sub> L in DMSO-d <sub>6</sub> . ....                                                                                                                                                                                                                                                                                                                           | 16 |
| <b>Fig. S17</b> TOF MS ES- of H <sub>4</sub> L. ....                                                                                                                                                                                                                                                                                                                                                                             | 16 |
| <b>TABLES</b> .....                                                                                                                                                                                                                                                                                                                                                                                                              | 17 |
| <b>Table S1</b> Crystal data and structure refinement parameters for compounds <b>1c</b> , H <sub>4</sub> L, <b>2</b> , and <b>3</b> . ....                                                                                                                                                                                                                                                                                      | 17 |
| <b>Table S2</b> Selected bond lengths (Å) and angles (°) for <b>2</b> . ....                                                                                                                                                                                                                                                                                                                                                     | 18 |
| <b>Table S3</b> Selected bond lengths (Å) and angles (°) for <b>3</b> . ....                                                                                                                                                                                                                                                                                                                                                     | 18 |
| <b>Table S4</b> Hydrogen bonding network in the crystal structure of H <sub>4</sub> L. ....                                                                                                                                                                                                                                                                                                                                      | 19 |
| <b>Table S5</b> Intermolecular interactions found in compound <b>2</b> . ....                                                                                                                                                                                                                                                                                                                                                    | 19 |
| <b>Table S6</b> Intermolecular hydrogen bonds found in the crystal structure of compound <b>3</b> . ....                                                                                                                                                                                                                                                                                                                         | 19 |
| <b>Table S7</b> Basis set effect on the $\tau$ angle, optimized at DFT level, and the absorption energy $E_{\text{abs}}$ , wavelength $\lambda_{\text{abs}}$ , and oscillator strength $f$ calculated at TD-DFT level. <sup>a</sup> .....                                                                                                                                                                                        | 20 |
| <b>Table S8</b> Adiabatic absorption energy $E_{\text{adia}}$ , vertical transition energy $E^{\text{GS-ES}\#1}$ , vertical transition wavelength $\lambda^{\text{GS-ES}\#1}$ , emission energy $E_{\text{fluo}}$ , and emission wavelength $\lambda_{\text{fluo}}$ calculated at TD-DFT level (PBE0//def2-SVP) for H <sub>4</sub> L in the gas phase and in DMSO. All energy values are given in eV and wavelengths in nm. .... | 20 |
| <b>Table S9</b> Transition vertical energy $E_{\text{abs}}$ (eV) and corresponding wavelengths $\lambda_{\text{abs}}$ (nm), oscillator strength $f$ and main monoelectron transition contributions (larger than 20%) calculated for the lowest four excited states calculated for compound <b>4</b> in the gas phase at TD-DFT level (PBE0//def2-SVP). ....                                                                      | 20 |

**Scheme S1** Different coordination modes of  $L^{4-}$ : I) chelating ( $\kappa^2O$ ); II) chelating/bridging ( $\mu$ -oxo- $1\kappa^2O$ - $2\kappa^1O$ ), III) bridging ( $\mu$ -oxo- $1\kappa^1O$ ,  $2\kappa^1O$ ).

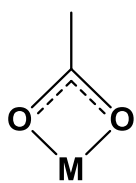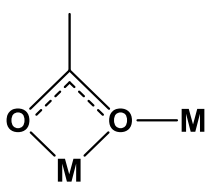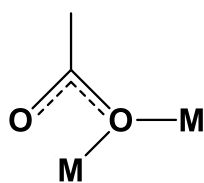

## Figures

**Fig. S1** Asymmetric unit of **1c**. Thermal ellipsoids are drawn at 50% probability level.

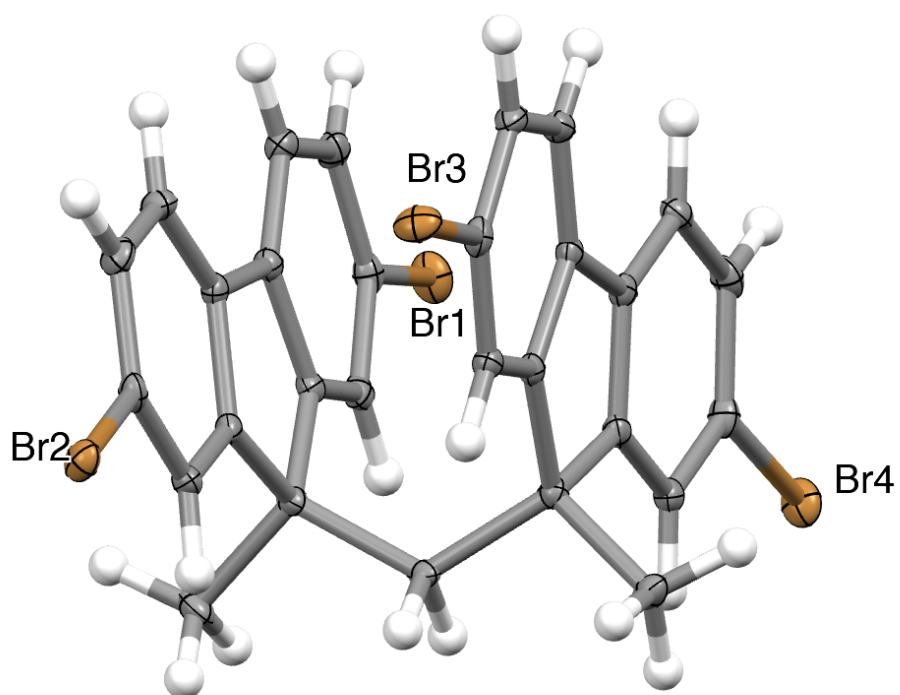

**Fig. S2** Crystal structure of **1c**: intra- and intermolecular  $\pi$ - $\pi$  interactions; hydrogen atoms omitted for clarity.

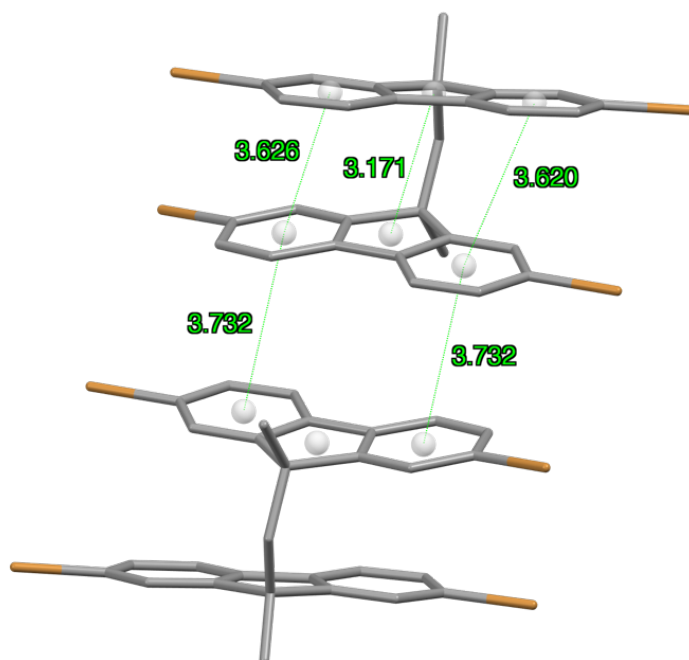

**Fig. S3** Packing diagram of **1c** along *a* axis. H atoms are omitted for clarity. Inter-molecular centroid distances 3.73 Å, Br $\cdots$ Br contacts of 3.62 and 3.63 Å.

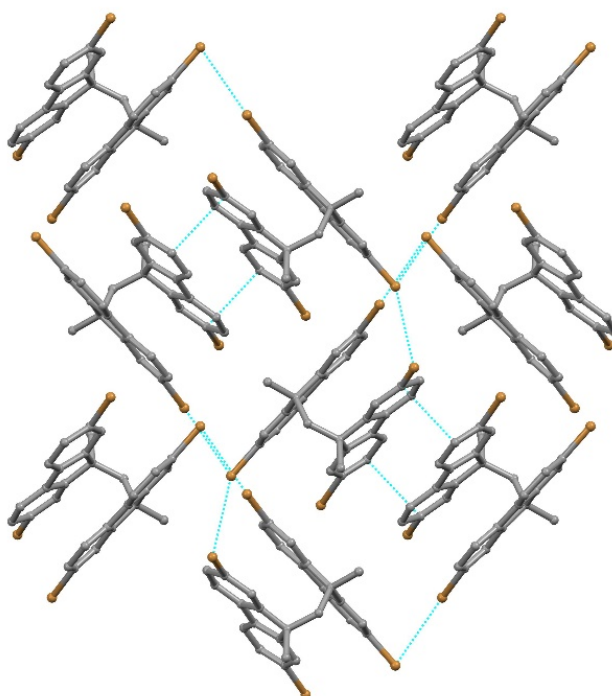

**Fig. S4** Packing view of the H<sub>4</sub>L chains along the 100 direction. Hydrogen bonding interactions are labelled accordingly to Table S1. Aryl protons not involved in showed interactions have been omitted for clarity reasons.

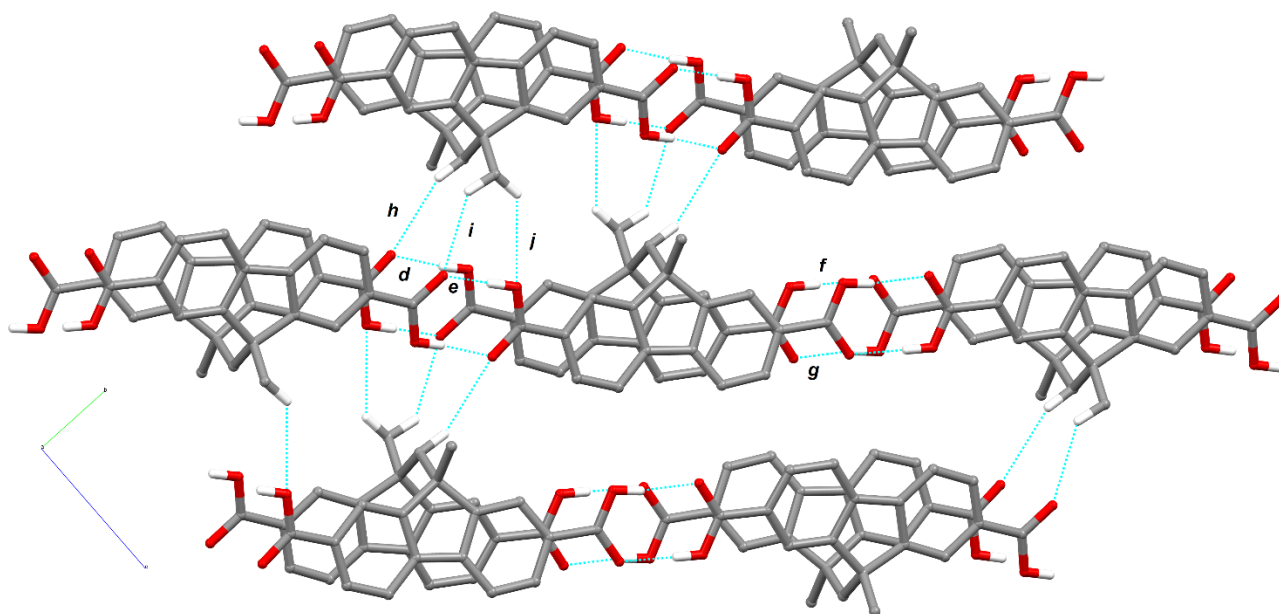

**Fig. S5** Intermolecular hydrogen bonding in the crystal structure of **2**. Interactions are labelled according to Table S5. Only interacting H atoms are shown for clarity.

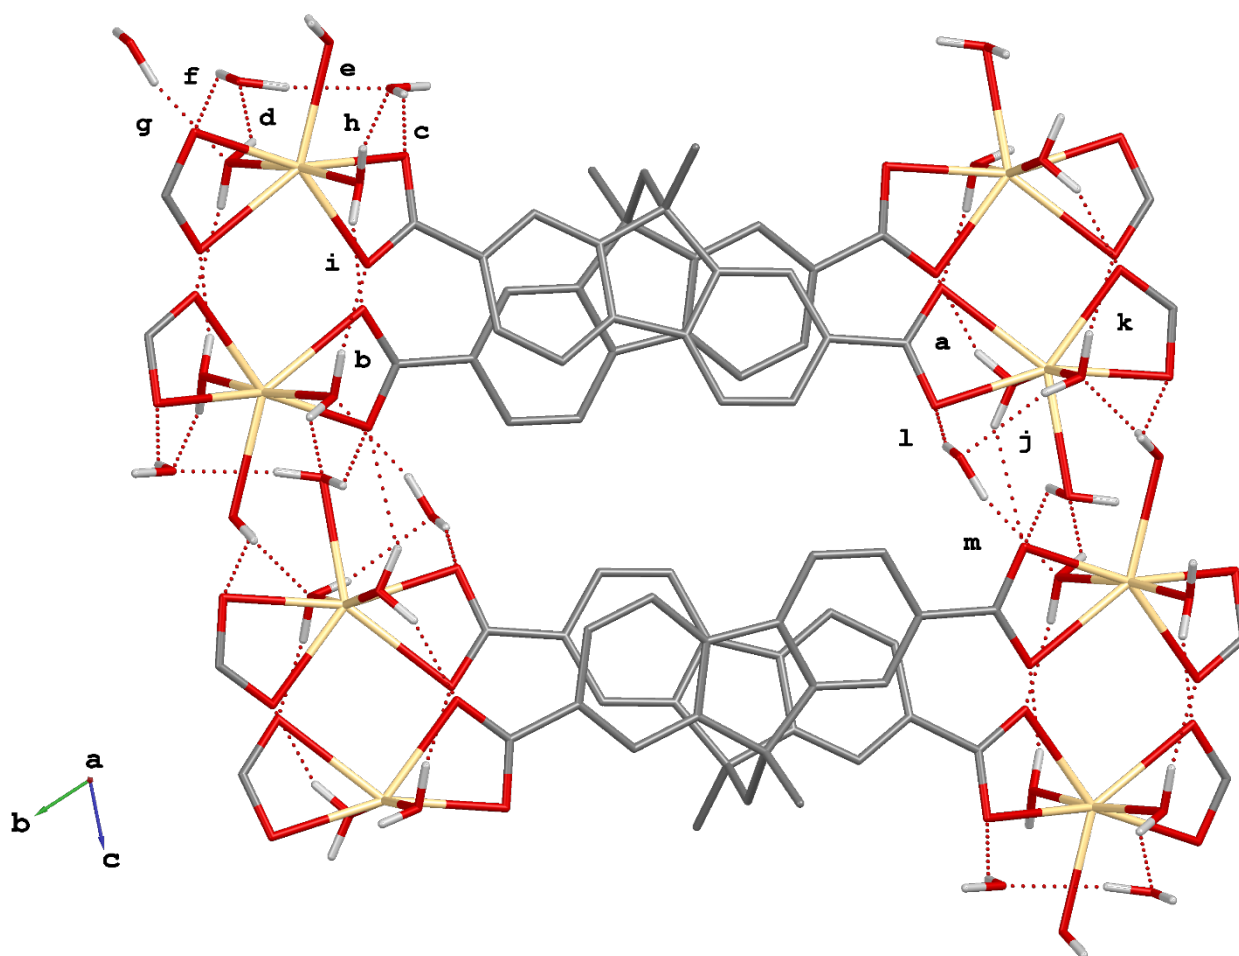

**Fig. S6** Packing diagrams of **2** along the *a* and *c* axis. Interactions are labelled according to Table S5. Only interacting H atoms are shown for clarity.

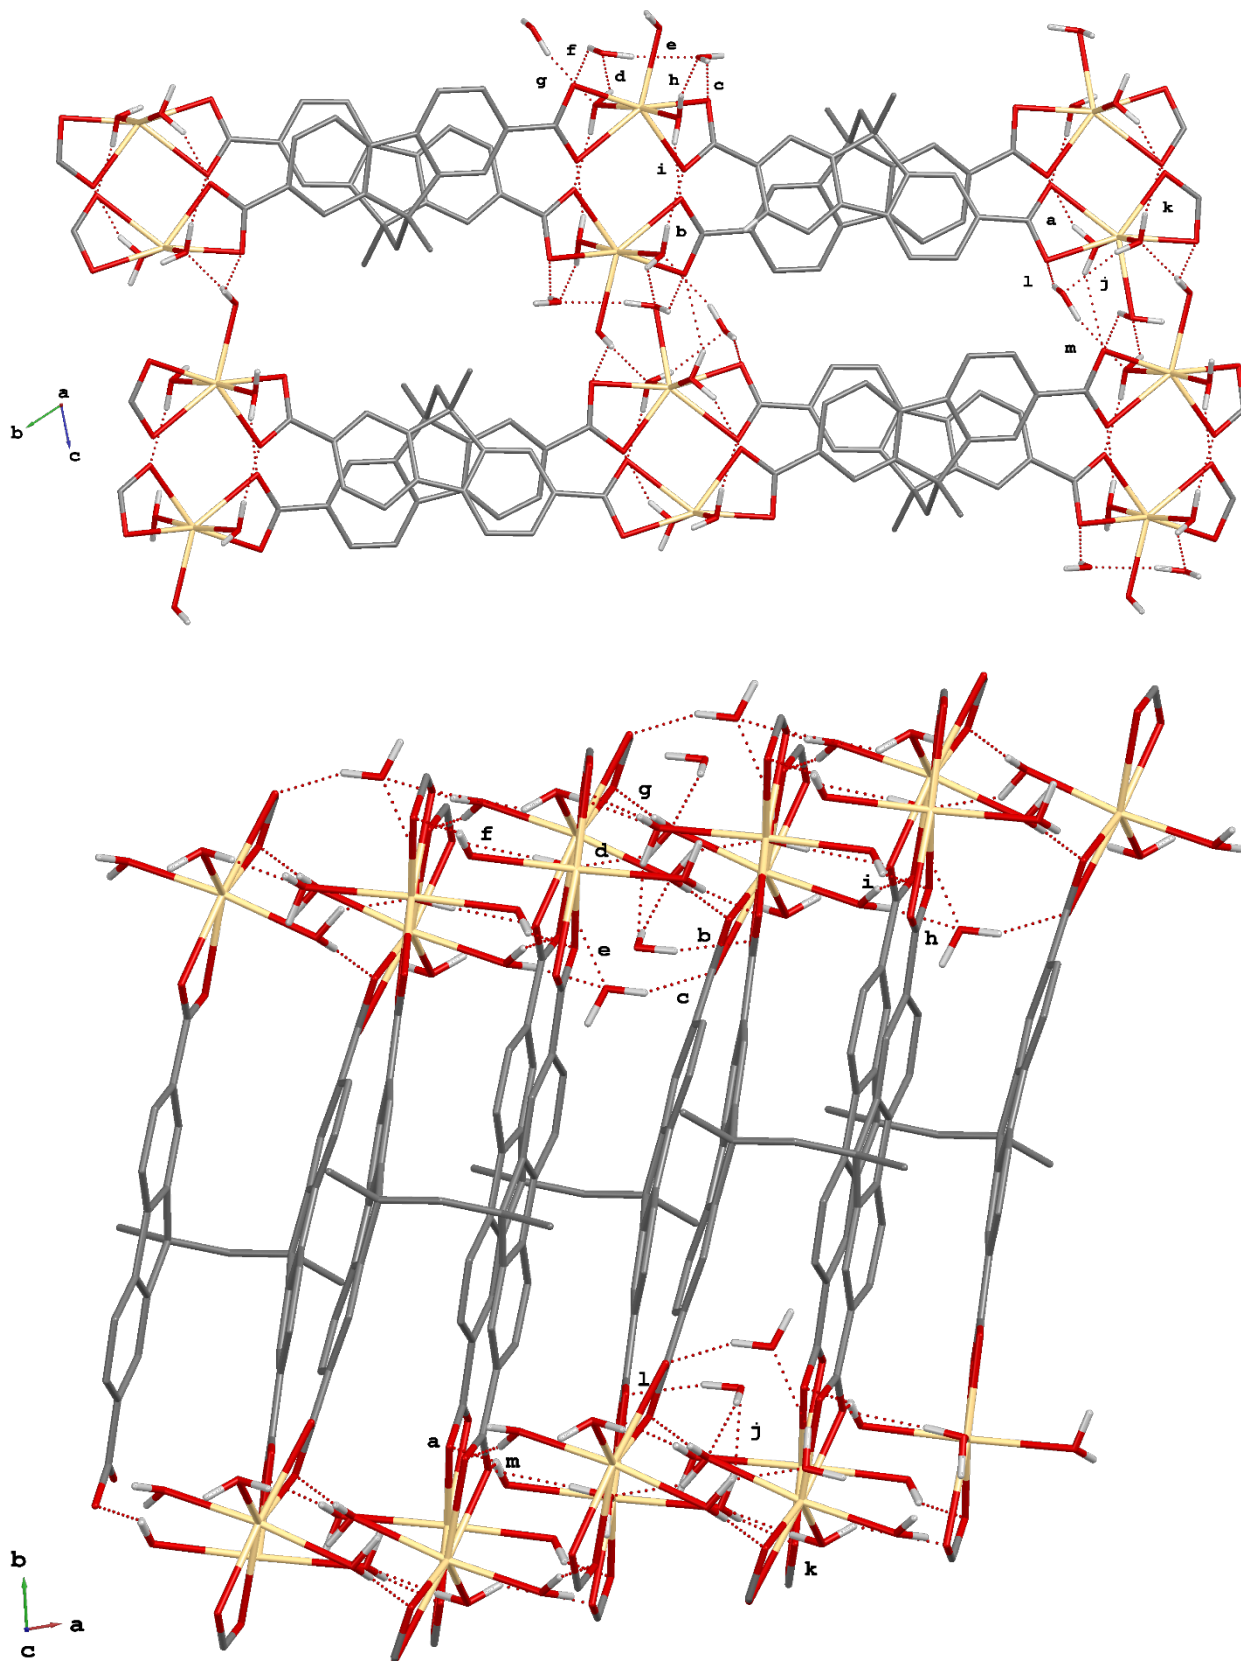

**Fig. S7** PXRD analysis: experimental patterns on the solvothermal reaction products between H<sub>4</sub>L and Cd(NO<sub>3</sub>)<sub>2</sub>·4H<sub>2</sub>O in a 1:2 molar ratio in a DMA/H<sub>2</sub>O mixture (2:1 v/v) at 90 (green) and 120 °C (blue); simulated patterns from CIFs of compounds **2** (black), **3**(red), H<sub>4</sub>L(magenta) are also shown for comparison.

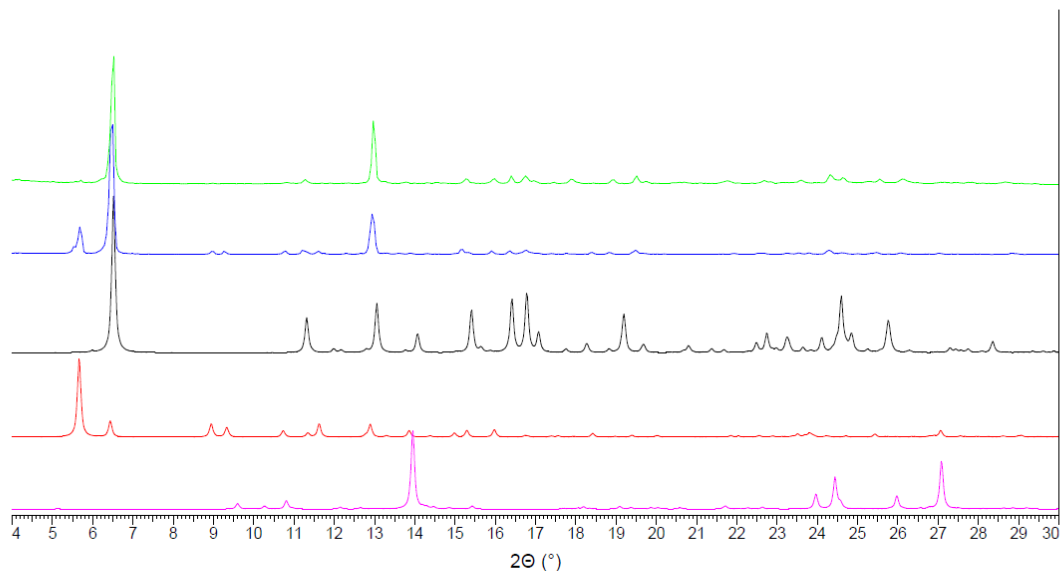

**Fig. S8** DSC (left) and TGA (right) analysis of compound **2** (black) and of the mixture **2+3** (red).

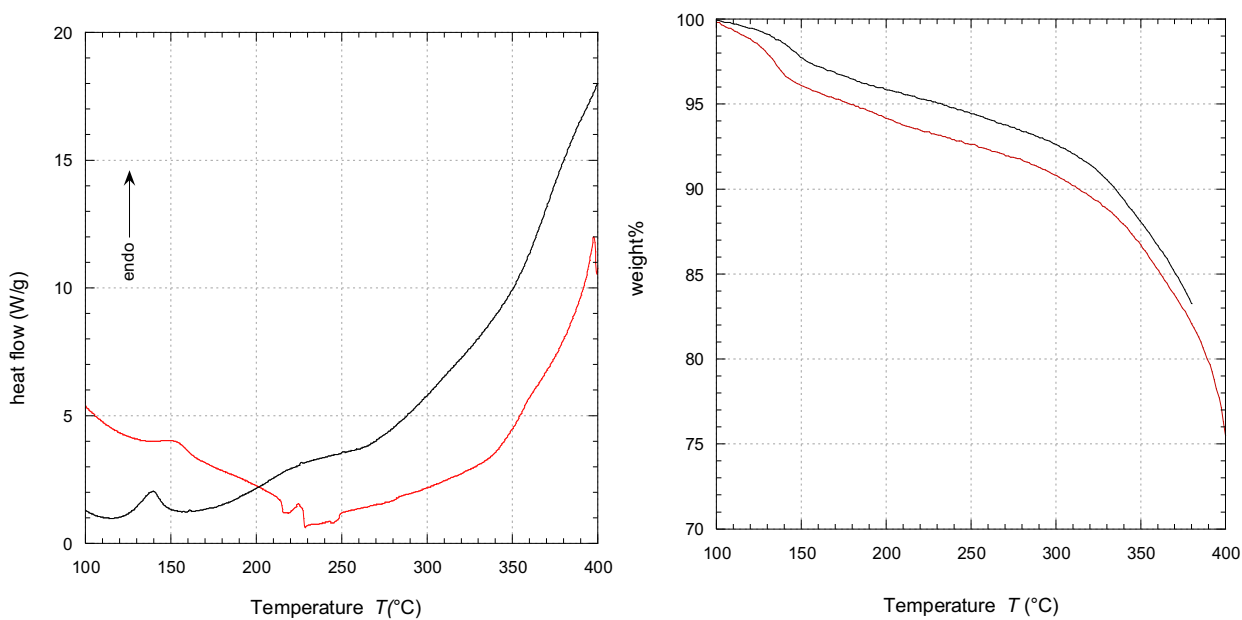



**Fig. S9** Absorption (solid line) and emission (dashed line) spectra for H<sub>4</sub>L measured in DMSO (left; [H<sub>4</sub>L] = 10<sup>-5</sup> M, λ<sub>ex</sub> = 303 nm) and in the solid state (right; λ<sub>ex</sub> = 372 nm).

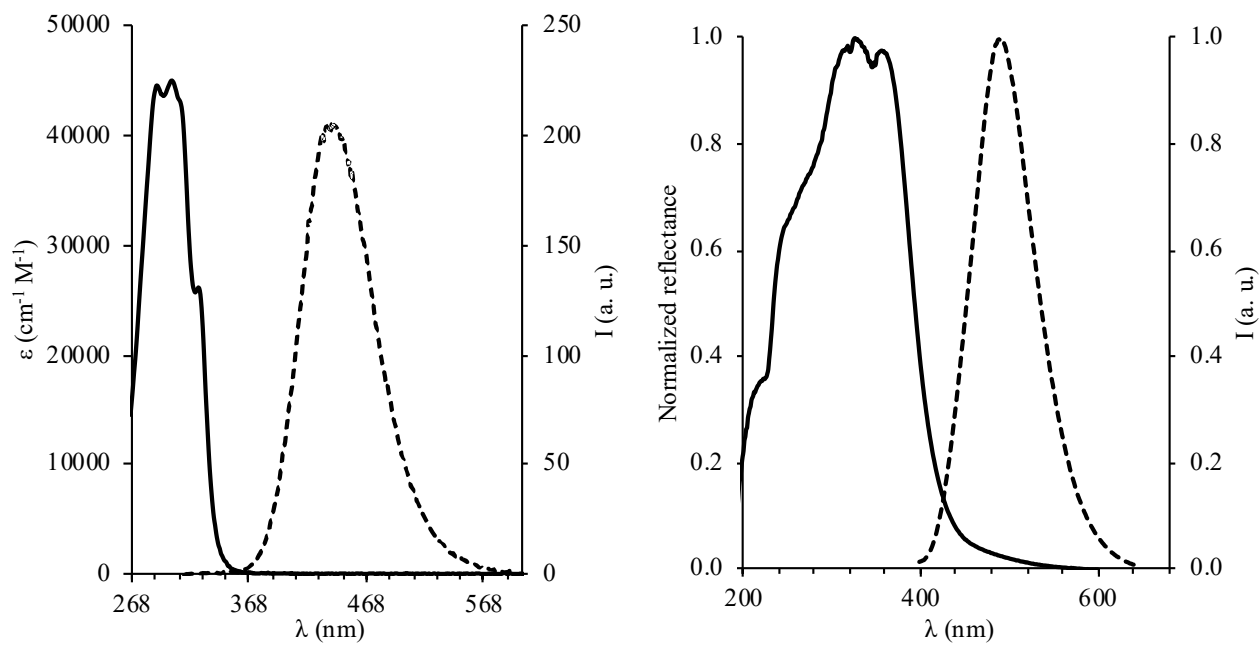

**Fig. S10** Normalised solid-state diffuse reflectance spectra (200–600 nm) determined for H<sub>4</sub>L (dark blue), compound **2** (green), and **2+3** (red).

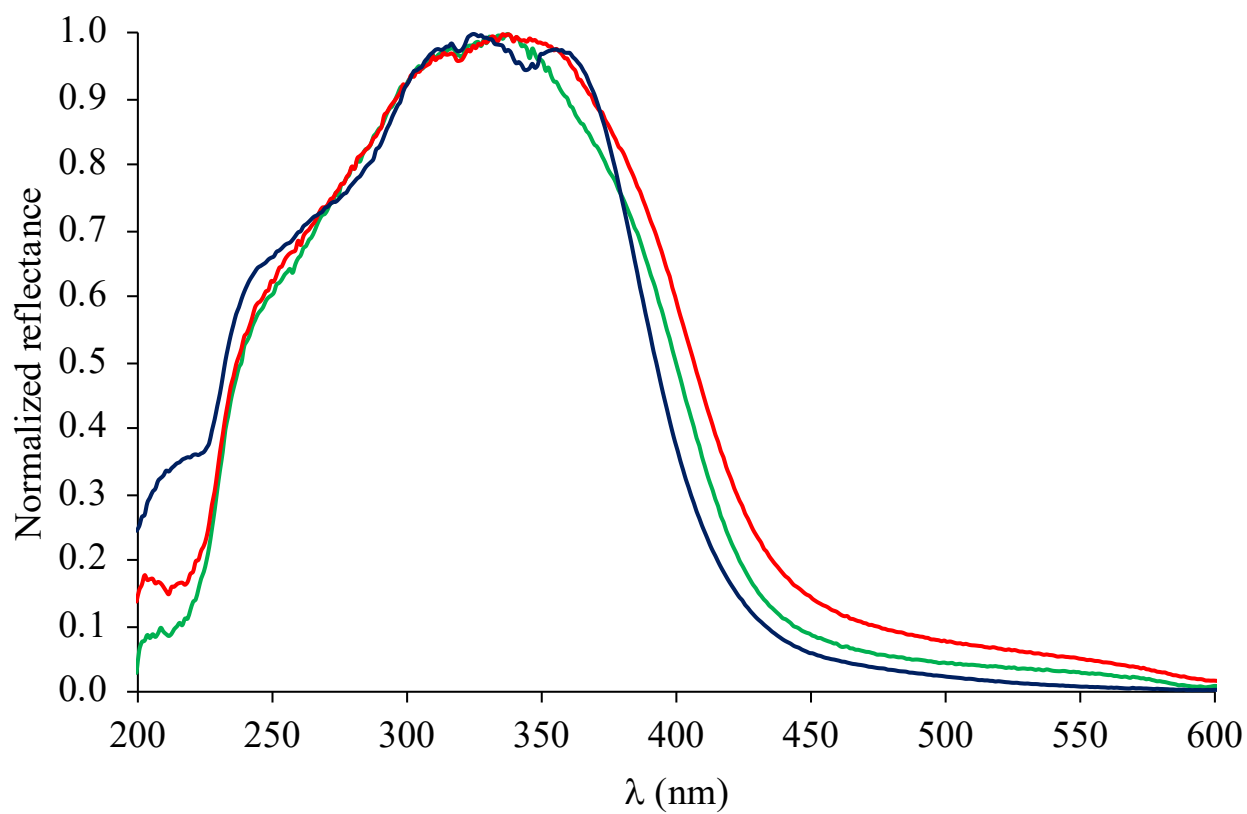

Fig. S11 Molecular orbitals isosurfaces calculated for H<sub>4</sub>L in the gas phase at DFT level (PBE0//def2-SVP): HOMO-1 (MO #142; a), HOMO (MO #143; b), LUMO (MO #144; c), and LUMO+1 (MO #145; d). Cutoff value = 0.05 |e|. Carbon atoms are depicted in grey and oxygen atoms in red; hydrogen atoms omitted for clarity.

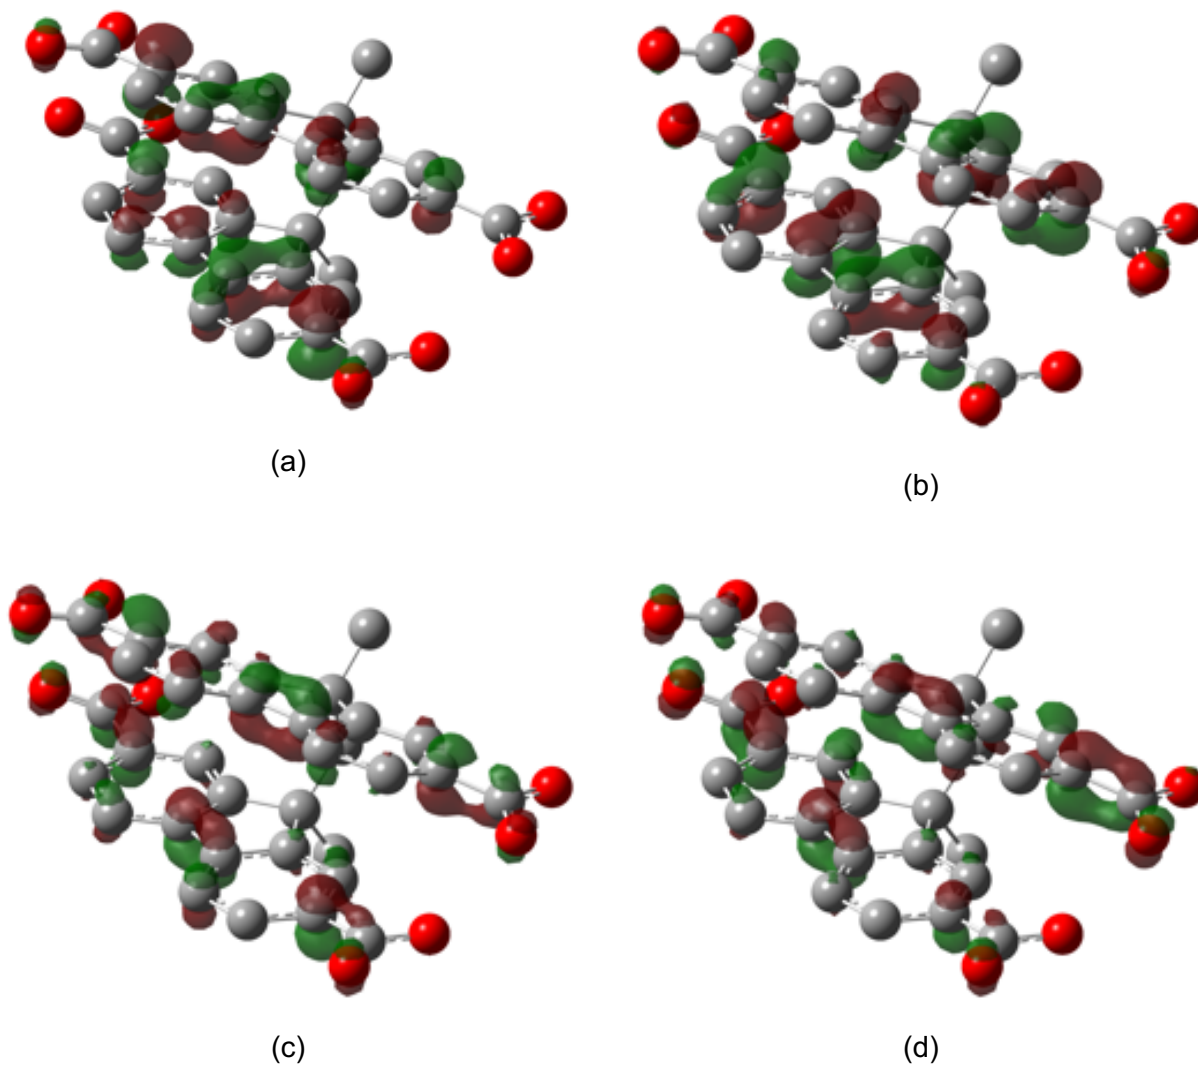

Fig. S12 Natural transition orbitals (NTOs) isosurfaces calculated for H<sub>4</sub>L in the gas phase at TD-DFT level for transition 4. NTO #143 (particle, a) and NTO #144 (hole, b) exhibit the largest occupations (0.57) for ES #4. Cutoff value = 0.05 |e|. Carbon atoms are depicted in grey and oxygen atoms in red; hydrogen atoms omitted for clarity.

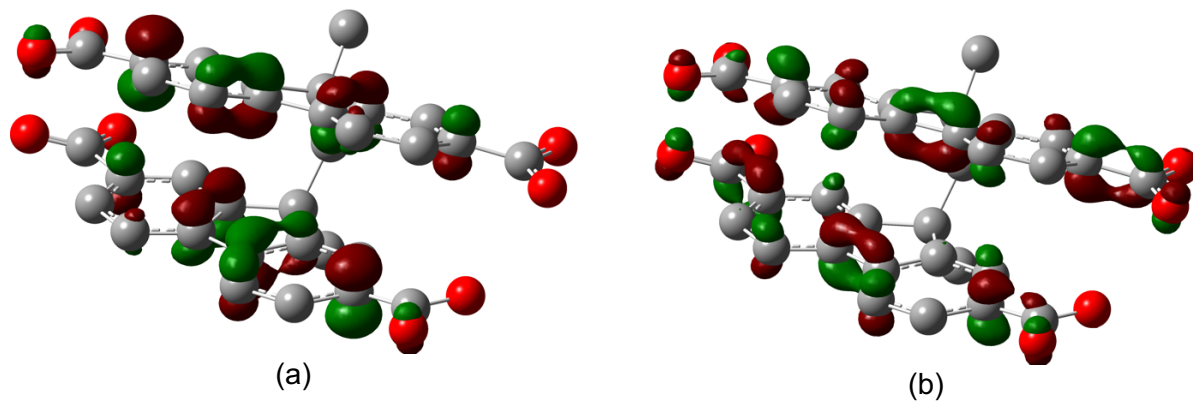

Fig. S13 Molecular orbitals isosurfaces calculated for model complex 4 (a) in the gas phase at DFT level (PBE0//def2-SVP): HOMO-1 (MO #258; b), HOMO (MO #259; c), LUMO (MO #260; d), and LUMO+1 (MO #261; e). Cut-off value = 0.05 |e|. Carbon atoms are depicted in grey, cadmium ions in green, and oxygen atoms in red; hydrogen atoms omitted for clarity.

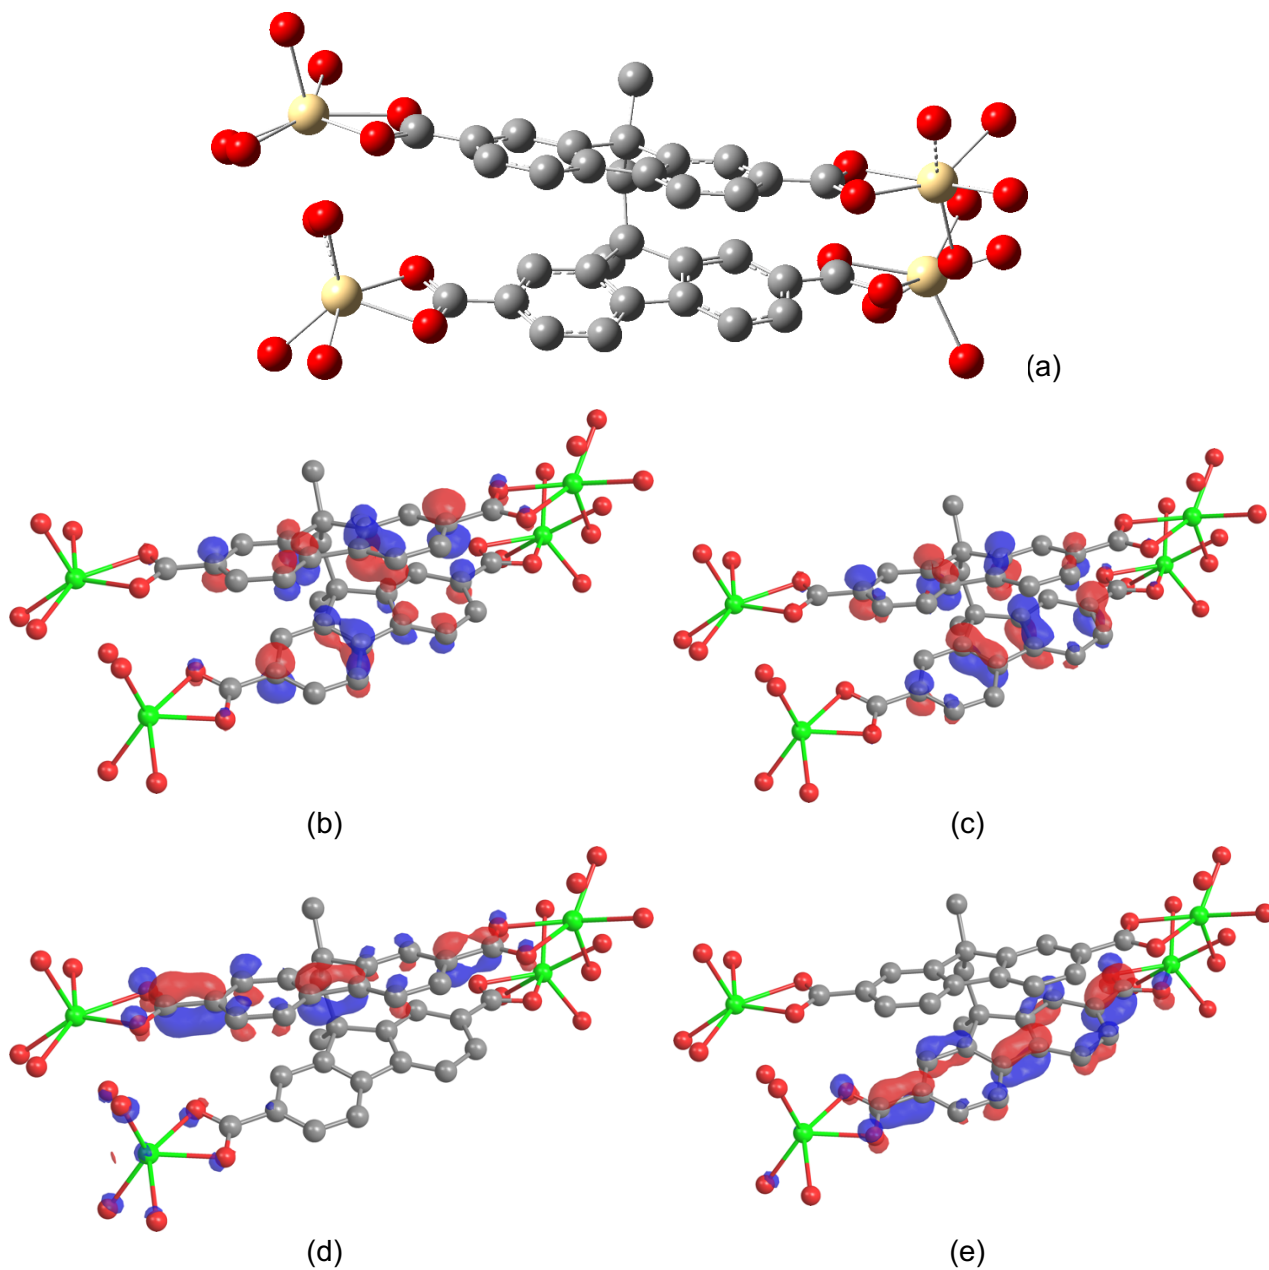

Fig. S14 Natural transition orbitals (NTOs) isosurfaces calculated for complex 4 in the gas phase at TD-DFT level for transition 4. NTO #259 (particle, a) and NTO #260 (hole, b) exhibit the largest occupations (0.52) for ES #4. Cutoff value = 0.05 |e|. Carbon atoms are depicted in grey and oxygen atoms in red; hydrogen atoms omitted for clarity.

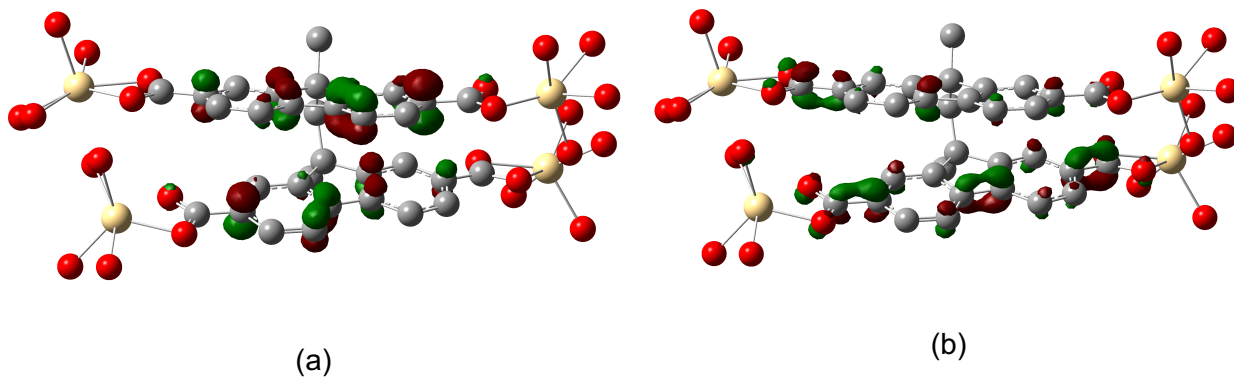

**Fig. S15**  $^1\text{H}$  NMR (400 MHz, DMSO- $d_6$ ) of H<sub>4</sub>L

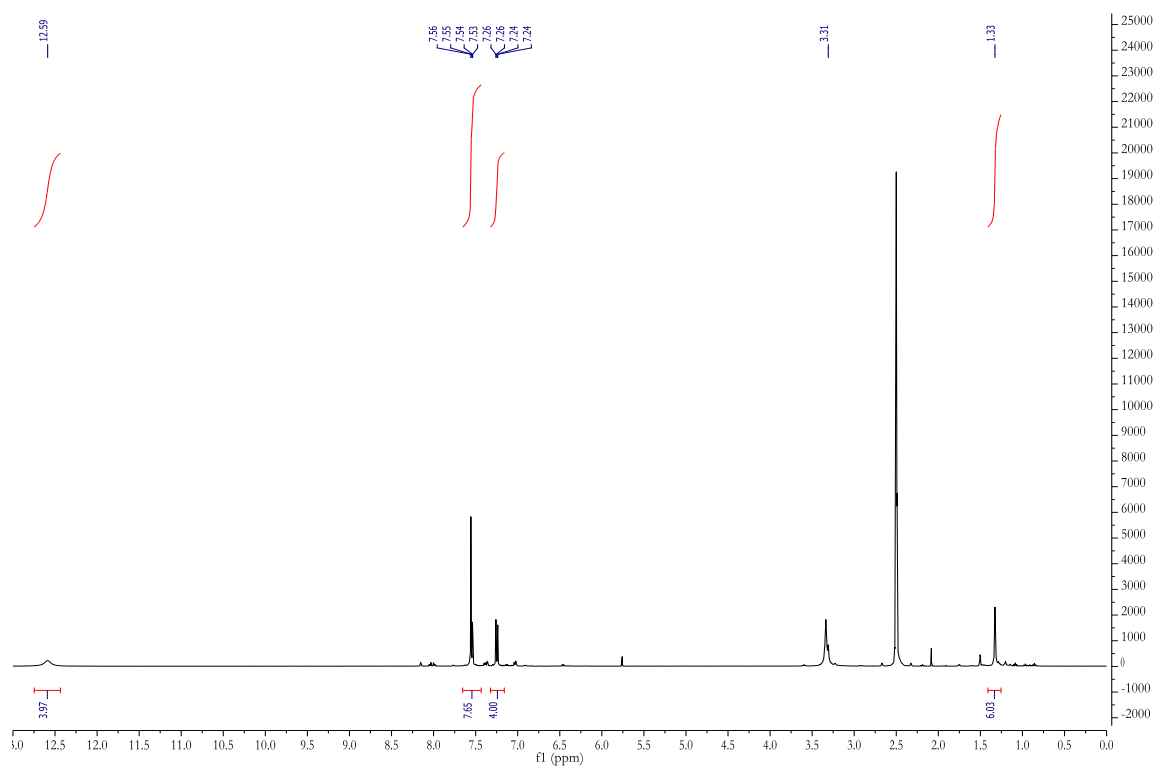

**Fig. S16**  $^{13}\text{C}\{^1\text{H}\}$  NMR (101 MHz, DMSO- $d_6$ ) of H<sub>4</sub>L

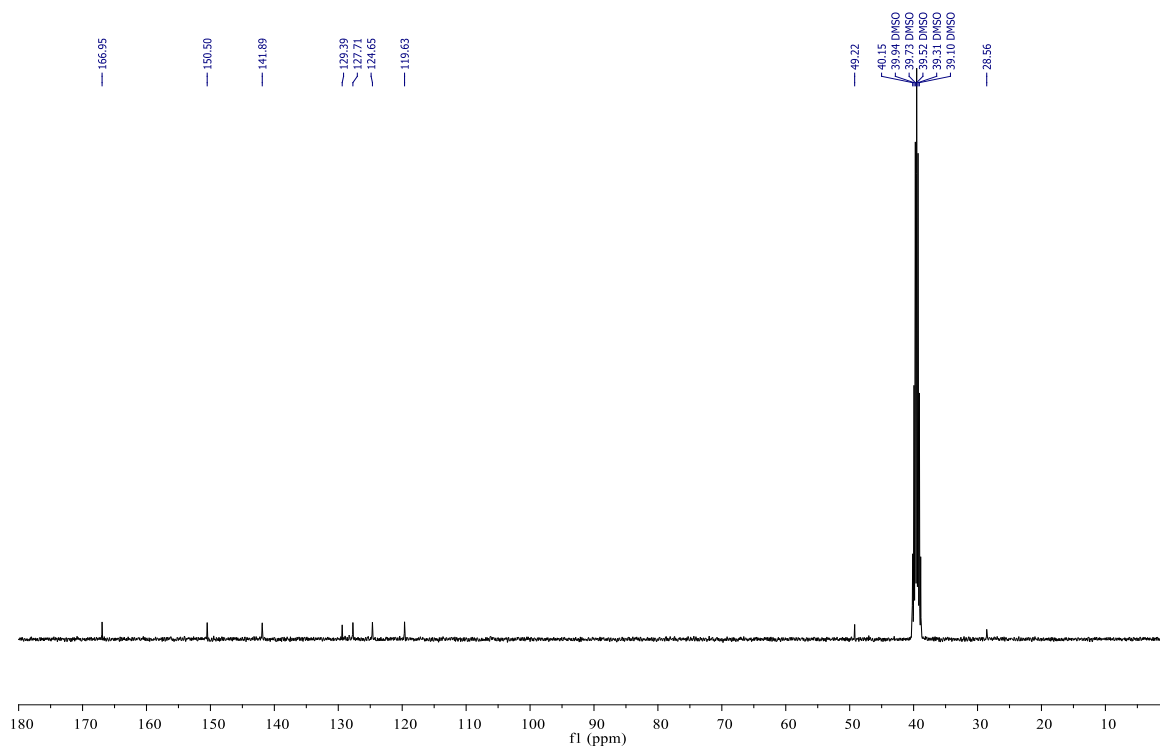

Fig. S17  $^1\text{H}$ - $^{13}\text{C}$  HMQC of H<sub>4</sub>L in DMSO-d<sub>6</sub>

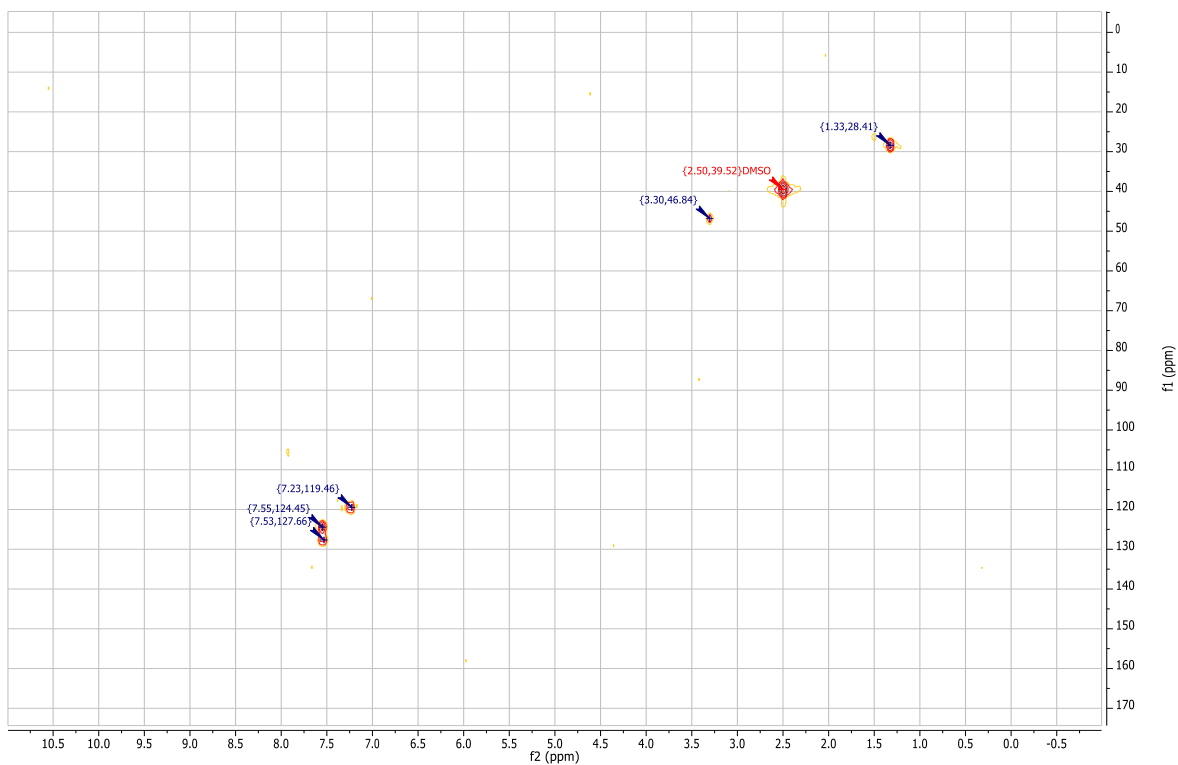

Fig. S18 TOF MS ES- of H<sub>4</sub>L

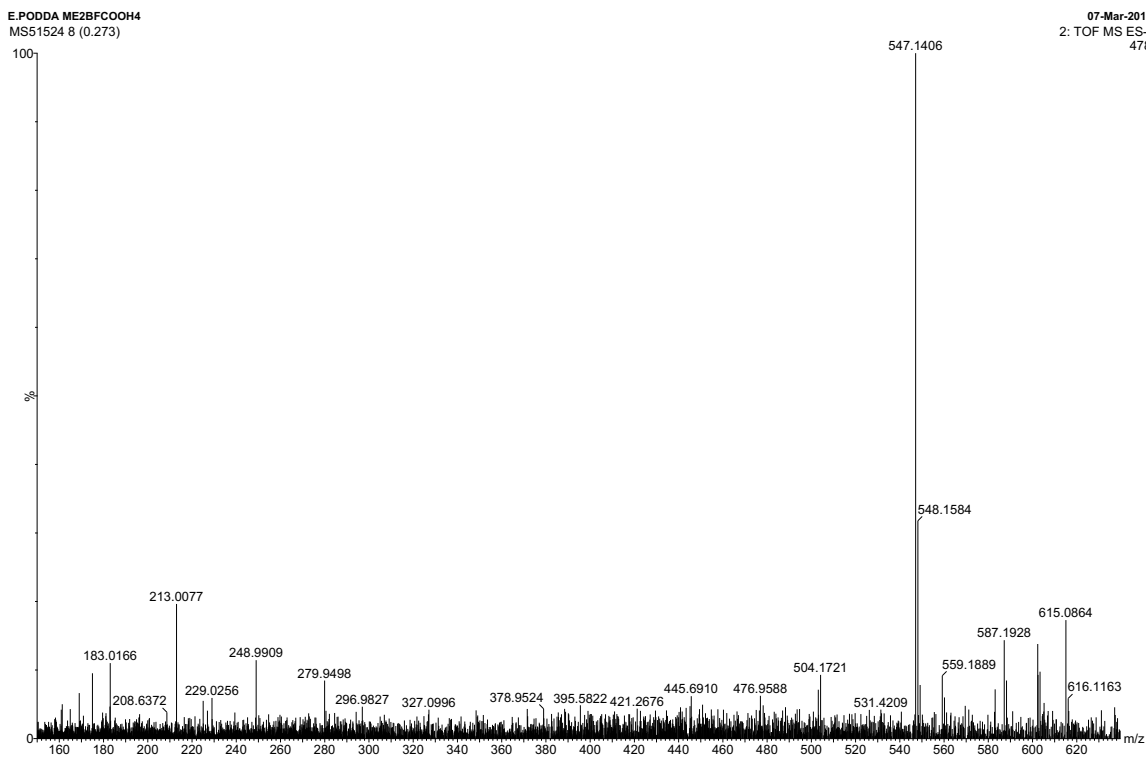



## Tables

**Table S1** Crystal data and structure refinement parameters for compounds **1c**, **H<sub>4</sub>L**, **2**, and **3**.

|                                                | <b>1c</b>                                       | <b>H<sub>4</sub>L</b>                          | <b>2</b>                                                                          | <b>3</b>                                                                          |
|------------------------------------------------|-------------------------------------------------|------------------------------------------------|-----------------------------------------------------------------------------------|-----------------------------------------------------------------------------------|
| Formula                                        | C <sub>29</sub> H <sub>20</sub> Br <sub>4</sub> | C <sub>33</sub> H <sub>24</sub> O <sub>8</sub> | C <sub>33</sub> H <sub>20</sub> Cd <sub>2</sub> O <sub>8</sub> ·8H <sub>2</sub> O | C <sub>33</sub> H <sub>20</sub> Cd <sub>2</sub> O <sub>8</sub> ·6H <sub>2</sub> O |
| <i>D</i> <sub>calc.</sub> / g cm <sup>-3</sup> | 1.896                                           | 1.454                                          | 1.808                                                                             | 1.649                                                                             |
| <i>μ</i> /mm <sup>-1</sup>                     | 6.695                                           | 0.864                                          | 1.345                                                                             | 10.775                                                                            |
| Formula Weight                                 | 688.09                                          | 548.52                                         | 913.42                                                                            | 823.34                                                                            |
| Colour                                         | colorless                                       | colorless                                      | colorless                                                                         | colorless                                                                         |
| Shape                                          | cut block                                       | block                                          | plate                                                                             | needle                                                                            |
| Size/mm <sup>3</sup>                           | 0.34×0.23×0.12                                  | 0.09×0.06×0.03                                 | 0.08×0.07×0.03                                                                    | 0.06×0.01×0.01                                                                    |
| <i>T</i> /K                                    | 100(2)                                          | 100(2)                                         | 100(2)                                                                            | 100(2)                                                                            |
| Crystal System                                 | monoclinic                                      | triclinic                                      | triclinic                                                                         | orthorhombic                                                                      |
| Flack Parameter                                | -                                               | -                                              | -                                                                                 | -0.005(12)                                                                        |
| Hooft Parameter                                | -                                               | -                                              | -                                                                                 | -0.002(6)                                                                         |
| Space Group                                    | <i>P</i> 2 <sub>1</sub> / <i>c</i>              | <i>P</i> -1                                    | <i>P</i> -1                                                                       | <i>Cmc</i> 2 <sub>1</sub>                                                         |
| <i>a</i> /Å                                    | 8.79840(10)                                     | 7.9080(6)                                      | 7.7940(3)                                                                         | 27.4335(7)                                                                        |
| <i>b</i> /Å                                    | 16.7929(2)                                      | 9.8092(5)                                      | 14.7078(6)                                                                        | 18.9368(6)                                                                        |
| <i>c</i> /Å                                    | 16.4790(2)                                      | 17.5752(9)                                     | 15.9272(6)                                                                        | 12.7660(5)                                                                        |
| <i>α</i> /°                                    | 90                                              | 86.930(4)                                      | 67.884(4)                                                                         | 90                                                                                |
| <i>β</i> /°                                    | 98.0820(10)                                     | 78.372(5)                                      | 86.175(3)                                                                         | 90                                                                                |
| <i>γ</i> /°                                    | 90                                              | 69.784(6)                                      | 82.860(3)                                                                         | 90                                                                                |
| <i>V</i> /Å <sup>3</sup>                       | 2410.60(5)                                      | 1252.89(14)                                    | 1677.93(12)                                                                       | 6632.0(4)                                                                         |
| <i>Z</i>                                       | 4                                               | 2                                              | 2                                                                                 | 8                                                                                 |
| <i>Z</i> '                                     | 1                                               | 1                                              | 1                                                                                 | 1                                                                                 |
| Wavelength/Å                                   | 0.71075                                         | 1.54184                                        | 0.71075                                                                           | 1.54184                                                                           |
| Radiation type                                 | MoK <sub>α</sub>                                | Cu K <sub>α</sub>                              | MoK <sub>α</sub>                                                                  | Cu K <sub>α</sub>                                                                 |
| <i>θ</i> <sub>min</sub> /°                     | 2.338                                           | 2.567                                          | 2.390                                                                             | 2.835                                                                             |
| <i>θ</i> <sub>max</sub> /°                     | 27.483                                          | 68.251                                         | 27.484                                                                            | 68.243                                                                            |
| Measured Refl's.                               | 54497                                           | 18130                                          | 38564                                                                             | 29109                                                                             |
| Indep't Refl's                                 | 5543                                            | 4549                                           | 7689                                                                              | 6102                                                                              |
| Refl's I≥2 <i>σ</i> (I)                        | 5047                                            | 3563                                           | 6284                                                                              | 4540                                                                              |
| <i>R</i> <sub>int</sub>                        | 0.0550                                          | 0.0316                                         | 0.0504                                                                            | 0.0790                                                                            |
| Parameters                                     | 300                                             | 382                                            | 478                                                                               | 437                                                                               |
| Restraints                                     | 0                                               | 4                                              | 15                                                                                | 8                                                                                 |
| Largest Peak                                   | 0.648                                           | 0.259                                          | 2.451                                                                             | 1.005                                                                             |
| Deepest Hole                                   | -0.451                                          | -0.265                                         | -0.958                                                                            | -0.935                                                                            |
| GooF                                           | 1.050                                           | 1.059                                          | 1.059                                                                             | 1.044                                                                             |
| <i>wR</i> <sub>2</sub> (all data)              | 0.0509                                          | 0.1547                                         | 0.1076                                                                            | 0.1821                                                                            |
| <i>wR</i> <sub>2</sub>                         | 0.0497                                          | 0.1460                                         | 0.1019                                                                            | 0.1674                                                                            |
| <i>R</i> <sub>1</sub> (all data)               | 0.0247                                          | 0.0672                                         | 0.0588                                                                            | 0.0889                                                                            |
| <i>R</i> <sub>1</sub>                          | 0.0208                                          | 0.0527                                         | 0.0441                                                                            | 0.0650                                                                            |

**Table S2** Selected bond lengths (Å) and angles (°) for **2**.

|                         |            |                                      |            |                                      |            |
|-------------------------|------------|--------------------------------------|------------|--------------------------------------|------------|
| Cd1–O1                  | 2.488(3)   | O2–Cd1–O1                            | 55.10(10)  | O3–Cd2–O7 <sup>2</sup>               | 145.49(10) |
| Cd1–O2                  | 2.272(3)   | O2–Cd1–O5 <sup>i</sup>               | 159.40(11) | O4–Cd2–O3                            | 55.11(10)  |
| Cd1–O5 <sup>i</sup>     | 2.390(3)   | O2–Cd1–O6 <sup>i</sup>               | 144.61(11) | O4–Cd2–O7 <sup>2</sup>               | 92.24(10)  |
| Cd1–O6 <sup>i</sup>     | 2.322(3)   | O2–Cd1–O9                            | 90.08(12)  | O4–Cd2–O8 <sup>2</sup>               | 145.70(10) |
| Cd1–O9                  | 2.318(3)   | O2–Cd1–O10                           | 82.07(10)  | O4–Cd2–O13                           | 129.88(11) |
| Cd1–O10                 | 2.379(3)   | O2–Cd1–O11                           | 86.79(12)  | O8 <sup>2</sup> –Cd2–O3              | 158.20(11) |
| Cd1–O11                 | 2.375(3)   | O5 <sup>i</sup> –Cd1–O1              | 144.79(10) | O8 <sup>2</sup> –Cd2–O7 <sup>2</sup> | 53.50(10)  |
| Cd2–O3                  | 2.444(3)   | O6 <sup>i</sup> –Cd1–O1              | 89.83(10)  | O8 <sup>2</sup> –Cd2–O13             | 84.13(11)  |
| Cd2–O4                  | 2.330(3)   | O6 <sup>i</sup> –Cd1–O5 <sup>i</sup> | 55.95(10)  | O12–Cd2–O3                           | 87.66(11)  |
| Cd2–O7 <sup>ii</sup>    | 2.528(3)   | O6 <sup>i</sup> –Cd1–O10             | 133.14(10) | O12–Cd2–O4                           | 92.81(11)  |
| Cd2–O8 <sup>ii</sup>    | 2.344(3)   | O6 <sup>i</sup> –Cd1–O11             | 94.16(11)  | O12–Cd2–O7 <sup>2</sup>              | 82.71(10)  |
| Cd2–O12                 | 2.290(3)   | O9–Cd1–O1                            | 88.37(11)  | O12–Cd2–O8 <sup>2</sup>              | 85.07(11)  |
| Cd2–O13                 | 2.371(3)   | O9–Cd1–O5 <sup>i</sup>               | 86.18(12)  | O12–Cd2–O13                          | 98.42(11)  |
| Cd2–O14                 | 2.258(3)   | O9–Cd1–O6 <sup>i</sup>               | 93.79(11)  | O13–Cd2–O3                           | 76.64(10)  |
| O2–Cd1–O1               | 55.10(10)  | O9–Cd1–O10                           | 88.49(11)  | O13–Cd2–O7 <sup>2</sup>              | 137.49(10) |
| O2–Cd1–O5 <sup>i</sup>  | 159.40(11) | O9–Cd1–O11                           | 170.17(11) | O14–Cd2–O3                           | 97.88(13)  |
| O2–Cd1–O6 <sup>i</sup>  | 144.61(11) | O10–Cd1–O1                           | 137.03(10) | O14–Cd2–O4                           | 86.24(12)  |
| O2–Cd1–O9               | 90.08(12)  | O10–Cd1–O5 <sup>i</sup>              | 77.59(10)  |                                      | 90.08(12)  |
| O2–Cd1–O10              | 82.07(10)  | O11–Cd1–O1                           | 97.43(11)  |                                      | 82.07(10)  |
| O2–Cd1–O11              | 86.79(12)  | O11–Cd1–O5 <sup>i</sup>              | 93.49(12)  |                                      | 86.79(12)  |
| O5 <sup>i</sup> –Cd1–O1 | 144.79(10) | O11–Cd1–O10                          | 81.86(10)  |                                      | 144.79(10) |

Symmetry codes: <sup>i</sup> -x, -y, 1-z; <sup>ii</sup> 1-x, 2-y, -z.

**Table S3** Selected bond lengths (Å) and angles (°) for **3**.

|                        |           |                            |           |                                       |          |
|------------------------|-----------|----------------------------|-----------|---------------------------------------|----------|
| Cd1–O5                 | 2.408(14) | O5–Cd1–O5 <sup>i</sup>     | 71.4(6)   | O1–Cd3–O1 <sup>ii</sup>               | 79.0(5)  |
| Cd1–O7                 | 2.432(14) | O5–Cd1–O7                  | 95.1(5)   | O2–Cd3–O1                             | 54.0(4)  |
| Cd1–O8                 | 2.323(10) | O5–Cd1–O7 <sup>i</sup>     | 163.4(4)  | O2–Cd3–O1 <sup>ii</sup>               | 107.4(5) |
| Cd1–O12                | 2.345(14) | O7–Cd1–O7 <sup>i</sup>     | 96.5(6)   | O2–Cd3–O2 <sup>ii</sup>               | 88.5(7)  |
| Cd2–O3                 | 2.253(11) | O8–Cd1–O5 <sup>i</sup>     | 128.0(6)  | O3–Cd3–O1 <sup>ii</sup>               | 162.6(5) |
| Cd2–O10                | 2.15(4)   | O8–Cd1–O5                  | 78.9(5)   | O3–Cd3–O1                             | 99.2(4)  |
| Cd2–O11                | 2.236(14) | O8 <sup>1</sup> –Cd1–O7    | 117.6(5)  | O3–Cd3–O2                             | 84.5(4)  |
| Cd2–O12 <sup>iii</sup> | 2.411(19) | O8–Cd1–O7                  | 55.2(5)   | O3–Cd3–O2 <sup>ii</sup>               | 140.9(4) |
| Cd3–O1                 | 2.443(11) | O8–Cd1–O8 <sup>i</sup>     | 87.8(5)   | O3 <sup>2</sup> –Cd3–O2 <sup>ii</sup> | 84.5(4)  |
| Cd3–O2                 | 2.365(15) | O8–Cd1–O12                 | 134.2(3)  | O3 <sup>2</sup> –Cd3–O2               | 77.3(5)  |
| Cd3–O3                 | 2.329(12) | O12–Cd1–O5                 | 84.8(5)   | O3–Cd3–O9                             | 83.3(5)  |
| Cd3–O9                 | 2.33(2)   | O12–Cd1–O7                 | 84.4(4)   | O9–Cd3–O1                             | 79.4(5)  |
| Cd4–O1                 | 2.420(12) | O3–Cd2–O3 <sup>ii</sup>    | 80.5(6)   | O9–Cd3–O2                             | 128.8(4) |
| Cd4–O5                 | 2.594(17) | O3–Cd2–O12 <sup>iii</sup>  | 86.7(4)   | O1 <sup>iv</sup> –Cd4–O1 <sup>v</sup> | 79.9(5)  |
| Cd4–O6                 | 2.296(12) | O10–Cd2–O3                 | 91.1(6)   | O1 <sup>v</sup> –Cd4–O5               | 76.5(5)  |
| Cd4–O13                | 2.39(3)   | O10–Cd2–O11                | 89.8(6)   | O1 <sup>iv</sup> –Cd4–O5              | 117.5(4) |
| O1–C1                  | 1.28(2)   | O10–Cd2–O12 <sup>iii</sup> | 177.0(8)  | O5–Cd4–O5 <sup>i</sup>                | 65.6(5)  |
| O2–C1                  | 1.24(2)   | O11–Cd2–O3 <sup>ii</sup>   | 87.6(6)   | O6–Cd4–O1 <sup>iv</sup>               | 159.1(4) |
| O3–C22                 | 1.274(19) | O11–Cd2–O3                 | 168.1(6)  | O6–Cd4–O1 <sup>v</sup>                | 79.5(4)  |
| O4–C22                 | 1.28(2)   | O11–Cd2–O11 <sup>ii</sup>  | 104.3(10) | O6–Cd4–O5                             | 53.7(4)  |
| O5–C12                 | 1.27(2)   | O11–Cd2–O12 <sup>iii</sup> | 92.1(5)   | O6–Cd4–O5 <sup>i</sup>                | 110.4(4) |
| O6–C12                 | 1.26(3)   |                            |           | O6 <sup>1</sup> –Cd4–O6               | 120.8(6) |
| O7–C30                 | 1.23(2)   |                            |           | O6–Cd4–O13                            | 93.1(6)  |
| O8–C30                 | 1.27(3)   |                            |           | O13–Cd4–O1 <sup>v</sup>               | 90.5(8)  |
|                        |           |                            |           | O13–Cd4–O5                            | 145.7(4) |

Symmetry codes: <sup>i</sup> 2-x, +y, +z; <sup>ii</sup> 1-x, +y, +z; <sup>iii</sup> -1/2+x, -1/2+y, +z; <sup>iv</sup> 1/2+x, 3/2-y, -1/2+z; <sup>v</sup> 3/2-x, 3/2-y, -1/2+z.

**Table S4** Hydrogen bonding network in the crystal structure of H<sub>4</sub>L.

| # |                                          | <b>d<sub>D...A</sub> (Å)</b> | <b>d<sub>H...A</sub> (Å)</b> | <b>α<sub>D-H...A</sub> (°)</b> |
|---|------------------------------------------|------------------------------|------------------------------|--------------------------------|
| d | O6 <sup>i</sup> -H6 <sup>i</sup> ...O1   | 2.641(3)                     | 1.79(6)                      | 175(5)                         |
| e | O2-H2...O5 <sup>ii</sup>                 | 2.604(3)                     | 1.82(2)                      | 160.3(2)                       |
| f | O8 <sup>ii</sup> -H8 <sup>ii</sup> ...O3 | 2.589(3)                     | 1.75(5)                      | 170(6)                         |
| g | O4-H4...O7 <sup>ii</sup>                 | 2.664(3)                     | 1.84(6)                      | 171(6)                         |
| h | C17-H17B...O1 <sup>iii</sup>             | 3.595(2)                     | 2.750(18)                    | 146.1(3)                       |
| i | C19-H19A...O5 <sup>iii</sup>             | 3.478(2)                     | 2.687(14)                    | 140.1(3)                       |
| j | C19-H19B...O2 <sup>iv</sup>              | 3.450(2)                     | 2.766(15)                    | 128.8(3)                       |

Symmetry codes: <sup>i</sup> 1-x, -y, -z; <sup>ii</sup> 1-x, 2-y, 1-z; <sup>iii</sup> +x, 1+y, +z; <sup>iv</sup> 1-x, 1-y, -z.

**Table S5** Intermolecular interactions found in compound **2**.

| # |                                             | <b>d<sub>D...A</sub> (Å)</b> | <b>d<sub>H...A</sub> (Å)</b> | <b>α<sub>D-H...A</sub> (°)</b> |
|---|---------------------------------------------|------------------------------|------------------------------|--------------------------------|
| a | O9-H9A...O6                                 | 2.759(4)                     | 1.97(3)                      | 152.2(2)                       |
| b | O12-H12A...O4 <sup>i</sup>                  | 2.693(4)                     | 1.85(3)                      | 174.2(2)                       |
| c | O15-H15A...O3                               | 2.741(5)                     | 1.98(3)                      | 148.2(3)                       |
| d | O12-H12B...O10                              | 2.783(4)                     | 2.06(3)                      | 142.6(2)                       |
| e | O10-H10A...O15                              | 2.800(5)                     | 2.00(4)                      | 153.4(2)                       |
| f | O10-H10B...O8 <sup>ii</sup>                 | 2.739(4)                     | 2.04(3)                      | 137.3(2)                       |
| g | O16 <sup>i</sup> -H16E...O12                | 2.970(5)                     | 2.15(3)                      | 162.8(3)                       |
| h | O14-H14A...O15 <sup>iii</sup>               | 2.687(5)                     | 1.85(4)                      | 165.6(3)                       |
| i | O14-H14B...O7 <sup>iii</sup>                | 2.710(5)                     | 1.88(3)                      | 165.3(3)                       |
| j | O11-H11A...O16 <sup>iv</sup>                | 2.841(5)                     | 2.03(4)                      | 157.7(2)                       |
| k | O11-H11B...O1 <sup>v</sup>                  | 2.679(4)                     | 1.85(3)                      | 165.6(2)                       |
| l | O16 <sup>iv</sup> -H16D <sup>iv</sup> ...O2 | 2.775(5)                     | 1.94(3)                      | 166.4(3)                       |
| m | O9-H9B...O8 <sup>vi</sup>                   | 3.032(5)                     | 2.31(3)                      | 142.3(2)                       |

Symmetry codes: <sup>i</sup> 1-x, 2-y, -z; <sup>ii</sup> -x, 2-y, -z; <sup>iii</sup> 1+x, +y, +z; <sup>iv</sup> 1-x, 1-y, 1-z; <sup>v</sup> 1-x, -y, 1-z; <sup>vi</sup> -x, 1-y, 1-z.

**Table S6** Intermolecular hydrogen bonds found in the crystal structure of compound **3**.

| # |                                                          | <b>d<sub>D...A</sub> (Å)</b> | <b>d<sub>H...A</sub> (Å)</b> | <b>α<sub>D-H...A</sub> (°)</b> |
|---|----------------------------------------------------------|------------------------------|------------------------------|--------------------------------|
| a | O9 <sup>ii</sup> -H9 <sup>vi</sup> ...O5                 | 2.825(19)                    | 1.96(12)                     | 155.4(8)                       |
| b | O11 <sup>i</sup> -H11A <sup>i</sup> ...O7 <sup>v</sup>   | 2.69(3)                      | 1.92(14)                     | 145.0(3)                       |
| c | O12-H12B <sup>v</sup> ...O4 <sup>i</sup>                 | 2.672(13)                    | 1.91(11)                     | 148.9(13)                      |
| d | O10 <sup>ii</sup> -H10 <sup>iii</sup> ...O2 <sup>i</sup> | 2.75(2)                      | 1.94(5)                      | 157(13)                        |

Symmetry codes according to Figure 3: <sup>i</sup> 3/2-x, 1/2+y, z; <sup>ii</sup> 3/2-x, 3/2-y, -1/2+z; <sup>iii</sup> 2-x, 2-y, -1/2+z; <sup>iv</sup> 3/2-x, 1/2+y, z; <sup>v</sup> 2-x, y, z; <sup>vi</sup> 1/2+x, 3/2-y, -1/2+z.

**Table S7** Basis set effect on the  $\tau$  angle, optimized at DFT level, and the absorption energy  $E_{\text{abs}}$ , wavelength  $\lambda_{\text{abs}}$ , and oscillator strength  $f$  calculated at TD-DFT level.<sup>a</sup>

| Basis set    | gas phase |                  |                                   |       |                       | DMSO solution |                  |                                   |       |                       |
|--------------|-----------|------------------|-----------------------------------|-------|-----------------------|---------------|------------------|-----------------------------------|-------|-----------------------|
|              | $\tau$    | $E_{\text{abs}}$ | $\lambda_{\text{abs}}^{\text{c}}$ | $f$   | $\lambda_{\text{em}}$ | $\tau$        | $E_{\text{abs}}$ | $\lambda_{\text{abs}}^{\text{c}}$ | $f$   | $\lambda_{\text{em}}$ |
| def2-SVP     | 26.00     | 4.162            | 297.9                             | 0.842 | 450.2                 | 21.62         | 4.089            | 303.2                             | 1.257 | 468.2                 |
| def2-TZVP    | 26.88     | 4.126            | 300.5                             | 0.912 | –                     | 21.75         | 4.025            | 308.0                             | 1.344 | –                     |
| 6-31G        | 27.37     | 4.139            | 299.5                             | 0.919 | 438.8                 | 21.44         | 4.050            | 306.1                             | 1.327 | 459.5                 |
| 6-311G       | 27.50     | 4.120            | 300.9                             | 0.907 | 445.3                 | 22.06         | 4.028            | 307.8                             | 1.368 | 468.1                 |
| 6-311+G(d,p) | 26.68     | 4.095            | 302.8                             | 0.930 | –                     | 21.87         | 3.989            | 310.9                             | 1.375 | –                     |

<sup>a</sup> PBE0 functional. <sup>c</sup> Experimental value  $\lambda_{\text{abs}} = 310$  nm in DMSO,  $\lambda_{\text{em}} = 436$  and 491 nm in DMSO and in the solid state, respectively.

**Table S8** Adiabatic absorption energy  $E_{\text{adia}}$ , vertical transition energy  $E^{\text{GS-ES}\#1}$ , vertical transition wavelength  $\lambda^{\text{GS-ES}\#1}$ , emission energy  $E_{\text{fluo}}$ , and emission wavelength  $\lambda_{\text{fluo}}$  calculated at TD-DFT level (PBE0//def2-SVP) for H<sub>4</sub>L in the gas phase and in DMSO. All energy values are given in eV and wavelengths in nm.

|                                     | gas    | DMSO   |
|-------------------------------------|--------|--------|
| $E_{\text{adia}}^{\text{GS-ES}\#1}$ | 3.3371 | 3.1846 |
| $E^{\text{GS-ES}\#1}$               | 3.8685 | 3.7266 |
| $\lambda^{\text{GS-ES}\#1}$         | 320.5  | 332.7  |
| $E_{\text{fluo}}$                   | 2.7543 | 2.6479 |
| $\lambda_{\text{fluo}}$             | 450.2  | 468.2  |

**Table S9** Transition vertical energy  $E_{\text{abs}}$  (eV) and corresponding wavelengths  $\lambda_{\text{abs}}$  (nm), oscillator strength  $f$  and main monoelectron transition contributions (larger than 20%) calculated for the lowest four excited states calculated for compound **4** in the gas phase at TD-DFT level (PBE0//def2-SVP).

| Exc. State               | #1            | #2            | #3            | #4            |
|--------------------------|---------------|---------------|---------------|---------------|
| $E_{\text{abs}}$         | 3.700         | 3.766         | 3.798         | 3.941         |
| $\lambda_{\text{abs}}$   | 335.1         | 329.3         | 326.5         | 314.6         |
| $f$                      | 0.019         | 0.018         | 0.027         | 0.959         |
| Excitations <sup>a</sup> | 259→260 (71%) | 258→260 (39%) | 258→261 (60%) | 258→260 (35%) |
|                          | 259→261 (22%) | 259→261 (36%) | 258→262 (23%) | 259→261 (32%) |

<sup>a</sup> KS-HOMO = MO 259.
